1 Low nutrient levels reduce the fitness cost of *MexCD-OprJ* efflux  
2 pump overexpression in ciprofloxacin-resistant *Pseudomonas*  
3 *aeruginosa*

4 Wenfang Lin<sup>1</sup>, Kun Wan<sup>1,2</sup>, Jie Zeng<sup>1,2</sup>, Jingjing Li<sup>1</sup>, Xi Li<sup>1,2</sup>, Xin Yu<sup>1\*</sup>

5 <sup>1</sup>*Key Lab of Urban Environment and Health, Institute of Urban Environment, Chinese*  
6 *Academy of Sciences, Xiamen, 361021, China*

7 <sup>2</sup>*University of Chinese Academy of Sciences, Beijing, 100049, China*

8 \*Corresponding Author. Phone & Fax: +86-0592-6190780; Email: xyu@iue.ac.cn

9

10 **Keywords:** efflux pumps, antibiotic resistance, fitness cost, low nutrient, *nfxB*  
11 mutation, ciprofloxacin resistance

12

13

14

15

16

17

18

19

20

21

22

23

24

25

26

27

28

29

30

31

32

33

34

35

36

37

38 **Abstract**

39       The long-term persistence of antibiotic resistance in the environment is a public  
40 health concern. Expression of an efflux pump, an important mechanism of resistance  
41 to antibiotics, is usually associated with a fitness cost in bacteria. In this study, we  
42 aimed to determine why antibiotic resistance conferred by overexpression of an efflux  
43 pump persists in environments such as drinking and source water in which antibiotic  
44 selective pressure may be very low or even absent. Competition experiments between  
45 wild-type *Pseudomonas aeruginosa* and ciprofloxacin-resistant mutants revealed that  
46 the fitness cost of ciprofloxacin resistance (strains *cip\_1*, *cip\_2*, and *cip\_3*)  
47 significantly decreased ( $P < 0.05$ ) under low-nutrient (0.5 mg/l total organic carbon  
48 (TOC)) relative to high-nutrient (500 mg/l TOC) conditions. Mechanisms underlying  
49 this fitness cost were analyzed. *MexD* gene expression in resistant bacteria (*cip\_3*

50 strain) was significantly lower ( $P < 0.05$ ) in low-nutrient conditions, with 10 mg/l  
51 TOC ( $8.01 \pm 0.82$ -fold), than in high-nutrient conditions, with 500 mg/l TOC ( $48.89 \pm$   
52  $4.16$ -fold). Moreover, *rpoS* gene expression in resistant bacteria ( $1.36 \pm 0.13$ -fold)  
53 was significantly lower ( $P < 0.05$ ) than that in the wild-type strain ( $2.78 \pm 0.29$ -fold)  
54 under low-nutrient conditions (10 mg/l TOC), suggesting a growth advantage.  
55 Furthermore, the difference in metabolic activity between the two competing strains  
56 was significantly smaller ( $P < 0.05$ ) in low-nutrient conditions (5 and 0.5 mg/l TOC).  
57 These results suggest that nutrient levels are a key factor in determining the  
58 persistence and spread of antibiotic resistance conferred by efflux pumps in the  
59 natural environment with trace amounts or no antibiotics.

60

## 61 **Importance**

62 The widespread of antibiotic resistance has led to an increasing concern about  
63 the environmental and public health risks. Mechanisms associated with antibiotic  
64 resistance including efflux pumps often increase bacterial fitness cost. Our study  
65 showed that the fitness cost of ciprofloxacin resistance conferred by overexpression of  
66 *MexCD-OprJ* efflux pump significantly decreased under low-nutrient relative to  
67 high-nutrient conditions. The significance of our research is to reveal that nutrient  
68 levels are key factor in determining the persistence of antibiotic resistance conferred  
69 by efflux pumps under conditions with trace amounts or no antibiotics, which can be  
70 mediated by some mechanisms including *MexD* gene expression, SOURs differences,  
71 and *rpoS* gene regulation.

72

## 73 **1. Introduction**

74 Continuing imprudent use of antibiotics has enriched antibiotic resistant  
75 bacteria in the environment. The spread of antibiotic-resistant pathogens has become a  
76 serious problem for human health around the world. Generally, bacterial antibiotic  
77 resistance is achieved through four main mechanisms (1): a reduction in outer  
78 membrane impermeability (2), enzymatic inactivation (3), target alterations (4), and

79 active efflux of antibiotics (5). Among these, rapid efflux of antibiotics from cells is  
80 thought to play a key role in the intrinsic resistance of clinically important bacteria,  
81 including *Pseudomonas aeruginosa*, *Escherichia coli*, and *Salmonella Typhimurium*  
82 (5, 6). To date, five families of bacterial efflux systems have been identified (5, 7): the  
83 resistance-nodulation-division family (RND), major facilitator (MF) family, multidrug  
84 and toxic efflux (MATE) family, small multidrug resistance (SMR) family, and  
85 ATP-binding cassette (ABC) family.

86 *P. aeruginosa* is a ubiquitous opportunistic human pathogen with high levels of  
87 antibiotic resistance. Four multidrug efflux systems belonging to the RND family  
88 have been well characterized in *P. aeruginosa*, including *MexAB-OprM*,  
89 *MexCD-OprJ*, *MexEF-OprN*, and *MexXY-OprM* (8-10). Efflux pump genes are often  
90 part of an operon, with a regulatory gene that controls expression. For example,  
91 *MexCD-OprJ* has been shown to confer resistance to fluoroquinolones such as  
92 ciprofloxacin. *NfxB* is a transcriptional regulator that tightly represses the expression  
93 of *MexCD-OprJ* in wild-type strains. Overexpression of efflux pumps can result from  
94 mutations in repressor genes. In resistant *P. aeruginosa*, a mutation in *nfxB* leads to  
95 derepression of *MexCD-OprJ*, causing high levels of ciprofloxacin resistance (11).

96 It is generally accepted that the acquisition of antibiotic resistance imposes  
97 fitness cost on bacteria (12). Resistance acquired through mutation of elements with  
98 important physiological roles imposes a metabolism burden on bacteria. Consequently,  
99 wild-type bacteria might outcompete resistant bacteria in the absence of antibiotic  
100 selective pressure. For example, *nfxB* mutants have only rarely been detected in a  
101 clinical setting since they were first described by Hirai two decades ago (13). An  
102 attractive hypothesis is that these bacteria were avirulent because of impaired fitness.  
103 Additionally, some previous studies have suggested that *nfxB* mutations in *P.*  
104 *aeruginosa* impair bacterial growth, all forms of motility (swimming, swarming, and  
105 twitching), and metabolic products such as siderophores, rhamnolipid, secreted  
106 protease, and pyocyanin, or that these mutations have led to specific changes in  
107 bacterial physiology (11, 14, 15).

108           The fitness cost of antibiotic resistance is strongly dependent on experimental  
109 conditions. For example, some resistance mutations have shown no cost in laboratory  
110 medium but a high cost in mice (16). Additionally, environmental factors such as  
111 temperature and resource availability affect the fitness cost of rifampicin resistance  
112 mutations (17). However, few studies have examined the contributions of efflux  
113 pumps to the fitness cost of bacterial antibiotic resistance. Overexpression of efflux  
114 pumps is known to consume a lot of energy, which may present a general burden to  
115 bacteria in the absence of antibiotics. In addition, bacteria utilize carbon compounds  
116 as an important energy source. Thus, we hypothesized that the availability of a carbon  
117 source would determine the fitness cost of antibiotic resistance conferred by  
118 overexpression of efflux pump in low-nutrient environments such as drinking or  
119 source water.

120           In this study, the effect of the environmental availability of nutrients on the  
121 fitness cost of bacterial antibiotic resistance conferred by overexpression of efflux  
122 pumps was investigated. The important opportunistic pathogen *P. aeruginosa* and its  
123 *MexCD-OprJ* efflux pump were the focus of this study. We aimed to identify whether  
124 *MexCD-OprJ* overexpression imposed a fitness cost on *P. aeruginosa* in different  
125 nutrient levels and to analyze the mechanisms underlying any cost.

126

## 127 **2. Materials and methods**

### 128 2.1 Strains and growth conditions

129           Bacterial strains used in this study are described in Table 1. Ciprofloxacin  
130 resistance in *P. aeruginosa* PAO1 were induced by the mutagenic disinfection  
131 byproduct dichloroacetonitrile (DCAN) (18). One ciprofloxacin-resistant strain (cip\_1)  
132 had mutations in both the *nfxB* gene (L83P) and *parC* gene (S65F). In addition, a  
133 mutation was identified in the *nfxB* gene of the cip\_3 (L14Q) and cip\_4 (L83P) strains.  
134 Moreover, an insertion mutation at nt 32 occurred in the cip\_2 *nfxB* gene. These  
135 mutants showed increased resistance to ciprofloxacin. The minimal inhibitory  
136 concentration (MIC) of ciprofloxacin in these mutants was 2 µg/ml, whereas the MIC

137 in wild-type *P. aeruginosa* PAO1 was 0.125 µg/ml. Bacteria cells were grown  
138 routinely in Luria-Bertani (LB) broth, with shaking at 200 rpm, 37 °C, and 0.5 ×  
139 MIC or without ciprofloxacin.

140

## 141 2.2 Fitness cost measurement

142 Fitness costs were determined by competition experiments between  
143 ciprofloxacin-resistant mutant and wild-type strains (19, 20). Briefly, overnight  
144 cultures of resistant and wild-type cells were washed twice with sterile saline solution.  
145 Resistant cultures were mixed with wild-type cultures at a ratio of 1:1, and 1.5 µl of  
146 this mixture was used to inoculate 15 ml of fresh artificial synthetic wastewater (SW)  
147 medium (21) under different nutrient conditions (total organic carbon [TOC]  
148 concentrations of 500, 50, 5, 0.5, and 0.05 mg/l) in the absence of antibiotics and at a  
149 starting cell density of 10<sup>5</sup> CFU/ml. Additionally, the SW medium was sterilized by  
150 pasteurization (70 °C for 30 min) to avoid potentially damaging components in the  
151 medium. Glucose was used as the sole carbon source in the SW medium for bacterial  
152 growth. Preliminary data revealed that *P. aeruginosa* PAO1 reached the stationary  
153 phase after 12 h in SW medium. Therefore, every 12 h, 1.5 ml of the cultures were  
154 inoculated into 15 ml of fresh SW medium for growth (15).

155 To determine the number of viable cells, the cultures were serially diluted by  
156 1:10 in saline solution, and suitable dilutions were plated every 12 h on antibiotic-free  
157 LB agar to count the total number of colonies. In parallel, plates containing antibiotics  
158 (1 mg/l ciprofloxacin) allowed the growth of mutant strains. The number of wild-type  
159 cells was calculated as the total number of bacterial cells minus the number of  
160 antibiotic-resistant cells. Competition experiments were performed in triplicate. One  
161 mutant (cip\_3) was selected for application in the following mechanistic analysis.

162

## 163 2.3 Mechanistic analysis

164 2.3.1 Quantitation of *MexD* gene expression by Reverse transcription quantitative  
165 real-time PCR (RT-qPCR)

166 To investigate the effect of an efflux pump on the fitness of a resistance mutant  
167 under different nutrient conditions, *MexD* gene expression was quantified by  
168 RT-qPCR. The Cip\_3 strain was grown in LB broth containing ciprofloxacin  
169 antibiotic overnight at 37 °C. Afterwards, the cultures were washed twice with saline  
170 solution and then re-suspended in 1 ml of the same buffer (optical density at 600 nm,  
171 0.3;  $\sim 1 \times 10^9$  CFU/ml). A 20- $\mu$ l aliquot of the pre-culture was inoculated into 200 ml  
172 of fresh SW medium containing 500 mg/l and 10 mg/l TOC (initial cell density,  $\sim 10^5$   
173 CFU/ml), and shaken at 37 °C. Simultaneously, *MexD* gene expression in wild-type *P.*  
174 *aeruginosa* PAO1 was quantitated as a control.

175 The cells were harvested in the stationary phase by centrifugation (7800 rpm for  
176 20 min). Total RNA was extracted from cell pellets using an RNA isolation kit  
177 (TransGene, China) according to the manufacture. After that, RNA was converted into  
178 cDNA using a cDNA synthesis kit (TransGene, China) according to the  
179 manufacturer's instructions to avoid RNA degradation. Primers used in this study are  
180 shown in Table S1. Quantitative RT-qPCR of the cDNA was performed on an ABI  
181 7300 detection system in 20- $\mu$ l reaction mixtures containing 100 ng isolated RNA,  
182 200 nM each of the two primers, and 10  $\mu$ l 2 $\times$  SYBR green PCR mixture. After an  
183 initial 2-min incubation at 95 °C, the reaction was subjected to 35 cycles of 95 °C for  
184 40 s, 60 °C for 30 s, and 72 °C for 40 s, and then a final 7-min incubation at 72 °C. A  
185 constitutively expressed gene (16S rRNA) was used as a control to normalize the  
186 results, and the amount of each RNA was calculated following the  $2^{\Delta\Delta\text{-ct}}$  method (22).

187

### 188 2.3.2 Quantitation of *rpoS* gene expression by RT-qPCR

189 To quantify *rpoS* gene expression, the bacterial strain (cip\_3) was grown to the  
190 early stationary phase in SW medium supplemented with 500 mg/l and 10 mg/l TOC  
191 and then harvested by centrifugation. Total RNA extraction and RT-qPCR were  
192 performed as described in 2.3.1.

193

### 194 2.3.3 Specific oxygen uptake rate (SOUR) measurement

195 SOUR was measured to evaluate differences in metabolic activity between  
196 resistant and wild-type cells under different nutrient conditions. One mutant (cip\_3)  
197 was selected as an example. The bacteria were cultured in LB broth at 37 °C  
198 overnight and washed twice with saline solution by centrifugation at 7800 rpm for 10  
199 min. The SW media containing 500 mg/l, 5 mg/l, and 0.5 mg/l TOC was aerated until  
200 it was saturated with dissolved oxygen (DO), and then the cell pellets were  
201 resuspended. The cell density was approximately  $10^{10}$  CFU/ml, and the oxygen  
202 concentration decreased with respiration of the bacteria. DO concentrations were  
203 recorded using a DO meter (Germany, Multi 3420). The slope in the DO  
204 concentration versus time was used to obtain SOUR values. All SOUR assays were  
205 conducted in triplicate.

206

## 207 2.4 Data analysis

### 208 2.4.1 Determination of bacterial fitness

209 The fitness cost of an efflux pump in a resistance mutant was evaluated by  
210 determining two values: the ratios of the competing strains ( $u$ ) and their fitness ( $fit_t$ ).  $u$   
211 is a denary logarithmic transformation of the ratios of the numbers of  
212 ciprofloxacin-resistant and wild-type cells at time  $t$ . To eliminate the effect of initial  
213 cell density, ratios of the cells numbers at time  $t$  were normalized to that at time  $t_0$  as  
214 follows:

$$215 \quad u = \log_{10} \left( \frac{(N_{rt} / (N_{vt} - N_{rt}))}{(N_{ro} / (N_{vo} - N_{ro}))} \right)$$

216

217 where  $(N_{rt}$  and  $N_{vt} - N_{rt})$  and  $(N_{ro}$  and  $N_{vo} - N_{ro})$  denote the absolute number of  
218 ciprofloxacin-resistant and wild-type cells at time  $t$  and  $t_0$ , respectively.  $u$  is equal to 0  
219 if there is no difference in fitness cost between the competing strains,  $u$  is positive if  
220 resistance reduces the bacterial fitness cost, and  $u$  is negative if resistance increases  
221 the bacterial fitness cost.



222 In addition, the bacterial fitness ( $fit_t$ ) of the two competing strains was calculated  
223 from the quotient of the growth rates of the competing strains at time  $t$  and the  
224 preceding time point  $t-1$ . This quotient was standardized with the exponent  $1/n$ .  $n$  is  
225 the number of generations of bacterial growth from  $t-1$  to  $t$ .  $fit_t$  is 1 plus the natural  
226 logarithmic transformation of the quotient using the following function (19):

$$227 \quad n = \log_2 \frac{N_t}{N_{t-1}}$$
$$228 \quad fit_t = 1 + \ln \left[ \left( \frac{(N_{rt} / (N_{vt} - N_{rt}))}{(N_{rt-1} / (N_{vt-1} - N_{rt-1}))} \right)^{1/n} \right]$$

$$229 \quad \overline{fit} = \frac{\sum_{i=1}^t fit_i}{t}, i = 1, 2, \dots, t$$

230

231 Furthermore,  $\overline{fit}$  denotes the average fitness ( $fit_t$ ).  $fit_t$  or  $\overline{fit}$  is equal to 1 if  
232 there is no difference in fitness cost between the competing strains,  $fit_t$  or  $\overline{fit}$  is  
233 above 1 if resistance reduces the bacterial fitness cost, and  $fit_t$  or  $\overline{fit}$  is below 1 if  
234 resistance increases the bacterial fitness cost.

235

#### 236 2.4.2 RT-qPCR

237 The relative expressions of *MexD* and *rpoS* gene were estimated by RT-qPCR.

238 Additionally, the  $2^{\Delta\Delta ct}$  method was used to calculate the qPCR data as follows:

$$239 \quad \Delta C_T = C_{T(\text{Target})} - C_{T(\text{Reference})}$$

$$240 \quad \Delta\Delta C_T = \Delta C_{T(\text{Treated})} - \Delta C_{T(\text{Control})}$$

$$241 \quad \text{Fold change} = 2^{-\Delta\Delta CT}$$

242

243 Where  $\Delta C_T$  is the difference in  $C_T$  values between the target gene (*MexD* or *rpoS*)  
244 and the endogenous reference gene (16S rRNA) for each sample, and  $\Delta\Delta C_T$  is the  
245 difference in the  $\Delta C_T$  values for the two samples (treated and control). The treated

246 sample is the bacterial strain grown in low-nutrient medium (5 mg/l TOC), and the  
247 control samples is the bacterial strain grown in high-nutrient medium (500 mg/l). The  
248 fold change in relative expression levels was calculated using the  $2^{-\Delta\Delta CT}$  method.  
249 Genes expression levels were considered elevated in the treatment groups when the  
250 fold change was  $>1$ .

251

### 252 2.4.3 Statistical analysis

253 Analysis of variance (ANOVA) and Kruskal-Wallis tests were used to determine  
254 significant differences in bacterial fitness ( $fit_t$ ) and SOUR under different nutrient  
255 conditions. Additionally, differences in *MexD* and *rpoS* gene expression levels under  
256 high and low-nutrient conditions were analyzed using Student's t-test. Results were  
257 significant at the 95% level ( $p < 0.05$ ).

258

## 259 3. Results and discussion

### 260 3.1 Growth curves under different nutrient conditions

261 The wild-type strain followed different growth curves than the  
262 ciprofloxacin-resistant strains (Fig. S1). As shown in Fig. S1, the wild-type strain  
263 grew to approximately  $10^7$ – $10^8$  CFU/ml 24 h after inoculation in the medium  
264 containing 500, 50, and 5 mg/l TOC. However, bacterial growth became unstable  
265 under low-nutrient conditions. It fluctuated around  $10^6$  CFU/ml in the medium  
266 containing 0.5 mg/l TOC and at about  $10^5$ – $10^6$  CFU/ml in the medium supplemented  
267 with 0.05 mg/l TOC. The cell concentrations depended on the available nutrients in  
268 the medium because the carbon source provided energy for microbial metabolism.

269 In contrast, the concentrations of the ciprofloxacin-resistant strains showed a  
270 downward trend under high-nutrient conditions (Fig. 1). The cell density reached  $10^6$ –  
271  $10^7$  CFU/ml 24 h after inoculation in the medium containing 50 mg/l TOC, but it  
272 decreased rapidly to  $10^5$  CFU/ml (cip\_1),  $10^1$  CFU/ml (cip\_3), and  $10^5$  CFU/ml  
273 (cip\_4). Similarly, the cell density decreased from  $10^6$  CFU/ml to  $10^2$  CFU/ml (cip\_1),  
274  $10^1$  CFU/ml (cip\_3), and  $10^5$  CFU/ml (cip\_4) under high-nutrient conditions with 500

275 mg/l TOC (Fig. 1).

276 However, growth of the resistant mutants was more stable under low-nutrient  
277 conditions. For instance, cell concentrations were maintained at  $10^5$ – $10^6$  CFU/ml in  
278 the presence of 0.5 mg/l TOC (cip\_1 and cip\_4). Similarly, the density of resistant  
279 strains was maintained at approximately  $10^4$ – $10^5$  CFU/ml in the medium  
280 supplemented with 0.05 mg/l TOC (cip\_1). Additionally, the cell density of cip\_3  
281 decreased in all nutrient conditions (500, 50, 5, and 0.5 mg/l TOC), but it showed a  
282 slower decrease at lower nutrient levels. Moreover, the cip\_2 resistance mutant  
283 remained at  $10^6$  CFU/ml in the medium supplemented with 0.5 mg/l TOC and  
284 fluctuated under low-nutrient conditions (0.05 mg/l TOC), although it was reduced  
285 only minimally, from  $10^7$  CFU/ml to  $10^6$  CFU/ml, in high-nutrient concentrations  
286 (500, 50, and 5 mg/l TOC). These results revealed that nutrient levels affected the  
287 growth of ciprofloxacin resistance mutant cells.

288

### 289 **3.2 Ratio of cell numbers and fitness costs for the two competing strains**

290 The ratios of two competing strains ( $u$ ) decreased under high-nutrient conditions  
291 (Fig. 2). Using cip\_2 as an example (Fig. 2b), the value of  $u$  decreased to  $-2$  in the  
292 medium containing 500 and 50 mg/l TOC. Additionally, this value gradually  
293 decreased to  $-1$  at a nutrition level of 5 mg/l TOC. This result indicated that the  
294 wild-type strain outcompeted the *nfxB* mutant that was resistant to ciprofloxacin. The  
295 acquisition of antibiotic resistance is generally assumed to represent an extra  
296 metabolic burden that affects bacterial fitness (23). However, the value of  $u$  fluctuated  
297 around 0 in the medium supplemented with 0.5 mg/l TOC. Furthermore, this value  
298 increased to 1 at 0.05 mg/l TOC. Similar trends were also observed for cip\_1, cip\_3,  
299 and cip4. These data indicate that the number of ciprofloxacin-resistant mutant cells  
300 was reduced less or even outcompeted by the wild-type strain under low-nutrient  
301 conditions.

302 In addition, the relative fitness ( $fit_t$ ) of the bacteria was also calculated (Fig. S2  
303 and 3). The values of  $fit_t$  were found to be below 1 more frequently at higher nutrient

304 levels (500, 50, and 5 mg/l TOC). However, the  $fit_t$  values were close to or above 1 for  
305 strains grown in medium with low nutrient levels (0.5 and 0.05 mg/l TOC). Next, the  
306 average fitness ( $\overline{fit}$ ) was calculated to more directly compare the fitness cost of  
307 resistant strains under different nutrient levels (Fig. 4). The average fitness ( $\overline{fit}$ ) of the  
308 four resistant mutants (cip\_1, cip\_2, cip\_3, and cip\_4) were all below 1 under higher  
309 nutrient conditions (5, 50, and 500 mg/l TOC), suggesting considerable fitness costs  
310 in the resistant bacteria. This result was in line with those of previous studies, in  
311 which *nfxB* mutants conferring resistance to ciprofloxacin were shown to impair  
312 fitness, expressed as a reduced growth rate or altered virulence and metabolite  
313 production (11, 14).

314 However, the fitness values increased with decreasing nutrient levels.  
315 Specifically, this value was above 1 in for cip\_2 and cip\_4 grown in medium  
316 containing 0.05 mg/l TOC ( $1.41 \pm 0.61$  and  $(1.04 \pm 0.32)$ , respectively). Additionally,  
317 the value of  $\overline{fit}$  for cip\_1 and cip\_4 reached nearly 1 at 0.5 mg/l TOC ( $1.14 \pm 0.35$   
318 and  $0.99 \pm 0.19$ , respectively). These results suggested that the fitness cost of the *nfxB*  
319 mutants was reduced in low-nutrient conditions. Furthermore, the values of  $\overline{fit}$  for  
320 cip\_1, cip\_2, and cip\_3 under low-nutrient conditions (0.5 mg/l) were significantly  
321 larger ( $P < 0.05$ ) than under high-nutrient conditions (500 mg/l TOC). Furthermore,  
322 this value for cip\_2 was also significantly larger ( $P < 0.05$ ) at low nutrient levels (0.05  
323 mg/l TOC) than at high nutrient levels (500 mg/l TOC). For cip\_4, no significant  
324 differences in the  $\overline{fit}$  values were observed in different nutrient conditions, but an  
325 increasing trend with decreasing nutrient levels was apparent. Consequently, the  
326 increased numbers of ciprofloxacin-resistant cells under low-nutrient conditions (Fig.  
327 1) can be explained by a decreasing fitness cost, and possible underlying mechanisms  
328 were explored in the following experiments.

329

### 330 3.3 Mechanisms analysis

### 331 **3.3.1 Efflux pump *MexD* gene expression**

332 As mentioned above, mutations in *nfxB* (L83P, L14Q, and L83P) caused  
333 ciprofloxacin resistance in the *cip\_1*, *cip\_3*, and *cip\_4* strains, respectively.  
334 Additionally, an insertion mutation at nt 32 was present in *nfxB* in the *cip\_2* strain. As  
335 shown in Fig. 5, *MexD* gene expression was much higher in the mutant strains than in  
336 the wild-type strain, regardless of whether they were grown in high- or low-nutrient  
337 conditions. According to Purssell and Poole (10), the *MexCD-OprJ* efflux pump is  
338 quiescent in wild-type *P. aeruginosa* cells and does not contribute to intrinsic  
339 antibiotic resistance under standard laboratory conditions. However, mutations in the  
340 *nfxB* repressor lead to hyperexpression of the *MexCD-OprJ* efflux pump. Moreover,  
341 *MexD* gene expression was significantly higher ( $P < 0.05$ ) under high-nutrient  
342 conditions containing (500 mg/l TOC;  $48.89 \pm 4.16$ -fold) than low-nutrient conditions  
343 (5 mg/l TOC;  $8.01 \pm 0.82$ -fold). Thus, less energy was needed for expression of the  
344 *MexCD-OprJ* efflux pump in *nfxB* mutants under low-nutrient conditions, which  
345 might have contributed to the reduction in fitness cost due to antibiotic resistance  
346 (24).

347

### 348 **3.3.2 *rpoS* gene regulation**

349 Sigma factor (*rpoS*) is known to regulate the expression of hundreds of genes  
350 involved in adaption of bacteria in the stationary phase (25) and in osmotic conditions  
351 (26) and other stress environments (27). Therefore, in wild-type cells, the *rpoS* gene is  
352 induced in low-nutrient conditions, which inhibit their growth. As shown in Fig. 6,  
353 expression of the *rpoS* gene in the wild-type strain was significantly higher ( $P < 0.05$ )  
354 with 10 mg/l TOC ( $2.78 \pm 0.29$ -fold) than with 500 mg/l TOC ( $1.02 \pm 0.02$ -fold).

355 However, at a low nutrient level (10 mg/l TOC), *rpoS* gene expression in the  
356 resistant mutants ( $1.36 \pm 0.13$ -fold) was significantly lower ( $P < 0.05$ ) than that in the  
357 wild-type strain ( $2.78 \pm 0.29$ -fold). Therefore, the inhibitory effect was less. The  
358 resistance mutants might show an advantage when competing with the wild-type  
359 strain. Similarly, in a previous study, Paulander et al. (28) found that the streptomycin

360 resistance mutations *K42N* and *P90S* in ribosomal protein S12 impaired bacterial  
361 growth in a nutrient-rich medium, but that the mutants grew faster in poor nutrient  
362 conditions than the wild-type strain because the *rpoS* gene was not induced.  
363 Consequently, *rpoS* gene regulation might contribute to the reduced fitness cost of  
364 ciprofloxacin resistance under low-nutrient conditions.

365

### 366 3.3.3 Metabolic activity comparison

367 SOUR is an important indicator of microbial metabolism activity. In this study,  
368 the SOURs of ciprofloxacin-resistant strains were significantly lower ( $P < 0.05$ ) than  
369 that of the wild-type strain at all nutrient levels (500, 5, and 0.5 mg/l TOC) (Fig. 7).  
370 For example, the SOURs of wild-type *P. aeruginosa* PAO1 were  $(7.19 \pm 0.12) \times 10^{-12}$ ,  
371  $(3.16 \pm 0.09) \times 10^{-12}$ , and  $(2.39 \pm 0.07) \times 10^{-12}$  mg O<sub>2</sub>/cells·h in the medium  
372 containing 500, 5, and 0.5 mg/l TOC, respectively. However, lower SOURs, i.e.  $(3.17$   
373  $\pm 0.05) \times 10^{-12}$ ,  $(2.03 \pm 0.05) \times 10^{-12}$ , and  $(1.80 \pm 0.04) \times 10^{-12}$  mg O<sub>2</sub>/cells·h, were  
374 observed for ciprofloxacin-resistant *P. aeruginosa* PAO1 at corresponding nutrient  
375 levels. These results indicated that the *nfxB* mutants had defects in metabolism. It is  
376 generally accepted that the acquisition of resistance is metabolically costly for  
377 bacteria (29). For example, Stickland et al. (11) found that a mutation in *nfxB*  
378 upregulated *MexCD-OprJ* expression, leading to global changes in *P. aeruginosa*  
379 PAO1 metabolism.

380 Additionally, the difference in SOURs between the two competing strains was  
381 reduced with decreasing nutrient levels (Fig. 5). The differences in SOURs under  
382 low-nutrient conditions (5 mg/l TOC, 1.56  $\pm$  0.04-fold; 0.5 mg/l TOC, 1.33  $\pm$   
383 0.04-fold) were significantly less ( $P < 0.05$ ) than those at 500 mg/l TOC (2.27  $\pm$   
384 0.03-fold). This might be an explanation for the reduction in fitness cost at low  
385 nutrient levels (0.5 and 5 mg/l TOC).

386

## 387 4. Conclusion

388 Antibiotic resistance in environmental bacteria is becoming a public health

389 problem. Efflux pumps play an important role in bacteria resistant to one or more  
390 antibiotics. This study shown that the ratio of the number of cells of two competing  
391 strains decreased and the average fitness of resistant mutants increased under  
392 low-nutrient conditions (0.05, 0.5, and 5 mg/l TOC), suggesting a reduction in fitness  
393 cost in the *nfxB* mutants in these cases. Some mechanisms, including those indicated  
394 by measures of *MexD* gene expression, SOURs, and *rpoS* gene regulation, were  
395 analyzed. *MexD* gene expression was shown to decrease in low-nutrient medium,  
396 meaning with lower energy consumption. In addition, *rpoS* gene expression levels  
397 were lower in the resistant mutants than in the wild-type strain in low-nutrient  
398 conditions, reducing the inhibitory effect of the gene product. Furthermore, the  
399 difference in SOURs between the two competing strains was reduced with decreasing  
400 nutrient levels. Therefore, low nutrient levels can reduce the fitness cost of  
401 ciprofloxacin resistance mediated by an efflux pump. In most natural environments  
402 such as source water, nutrient levels are low or even extremely low. Resistant bacteria  
403 can persist longer in these environments than in laboratory or clinical conditions; thus,  
404 antibiotic-resistant strains of bacteria in the environment are a reason for concern.

405

#### 406 **Conflict of interest**

407 The authors declare no competing financial interests.

408

#### 409 **Acknowledgements**

410 This study was funded by the National Science Foundation of China (no.  
411 51708534 and no. 51478450) and the National Key Research and Development  
412 Program of China-International collaborative project from the Ministry of Science and  
413 Technology (no. 2017YFE0107300).

414

#### 415 **References**

416 1. Baker-Austin C, Wright MS, Stepanauskas R, McArthur JV. 2006. Co-selection of  
417 antibiotic and metal resistance. *Trends Microbiol.* 14(4):176-182.

- 418 2. Delcour AH. 2009. Outer membrane permeability and antibiotic resistance.  
419 Biochimica et Biophysica Acta (BBA) - Proteins and Proteomics. 1794(5):808-816.
- 420 3. Wright GD. 2005. Bacterial resistance to antibiotics: Enzymatic degradation and  
421 modification. Adv Drug Delivery Rev. 57(10):1451-1470.
- 422 4. Lambert PA. 2005. Bacterial resistance to antibiotics: modified target sites. Adv  
423 Drug Delivery Rev. 57(10):1471-1485.
- 424 5. Webber MA, Piddock LJ. 2003. The importance of efflux pumps in bacterial  
425 antibiotic resistance. J Antimicrob Chemother. 51(1):9.
- 426 6. Poole K. 2001. Multidrug efflux pumps and antimicrobial resistance in  
427 *Pseudomonas aeruginosa* and related organisms. J Mol Microbiol Biotechnol.  
428 3(2):255-264.
- 429 7. Hernando-Amado S, Blanco P, Alcalde-Rico M, Corona F, Reales-Calderón JA,  
430 Sánchez MB, Martínez JL. 2016. Multidrug efflux pumps as main players in  
431 intrinsic and acquired resistance to antimicrobials. Drug Resist Updates.  
432 28(Supplement C):13-27.
- 433 8. Lister PD, Wolter DJ, Hanson ND. 2009. Antibacterial-resistant *Pseudomonas*  
434 *aeruginosa*: clinical impact and complex regulation of chromosomally encoded  
435 resistance mechanisms. Clin Microbiol Rev. 22(4):582-610.
- 436 9. Masuda N, Sakagawa E, Ohya S, Gotoh N, Tsujimoto H, Nishino T. 2000.  
437 Substrate specificities of *MexAB-OprM*, *MexCD-OprJ*, and *MexXY-oprM* efflux  
438 pumps in *Pseudomonas aeruginosa*. Antimicrob Agents Ch. 44(12):3322-3327.
- 439 10. Purssell A Poole K. 2013. Functional characterization of the *NfxB* repressor of  
440 the *MexCD-OprJ* multidrug efflux operon of *Pseudomonas aeruginosa*.  
441 Microbiology. 159(10):2058-2073.
- 442 11. Stickland HG, Davenport PW, Lilley KS, Griffin JL, Welch M. 2010. Mutation of  
443 *nfxB* Causes Global Changes in the Physiology and Metabolism of *Pseudomonas*  
444 *aeruginosa*. J Proteome Res. 9(6):2957-2967.
- 445 12. Andersson DI, Hughes D. 2010. Antibiotic resistance and its cost: is it possible to  
446 reverse resistance? Nat Rev Microbiol. 8(4):260-271.



- 447 13. Hirai K, Suzue S, Irikura T, Iyobe S, Mitsuhashi S. 1987. Mutations producing  
448 resistance to Norfloxacion in *Pseudomonas aeruginosa*. *Antimicrob Agents Ch.*  
449 31(4):582-586.
- 450 14. Jeannot K, Elsen S, Köhler T, Attree I, Van Delden C, Plésiat P. 2008. Resistance  
451 and virulence of *Pseudomonas aeruginosa* clinical strains overproducing the  
452 *MexCD-OprJ* efflux pump. *Antimicrob Agents Ch.* 52(7):2455-2462.
- 453 15. Olivares J, Alvarez-Ortega C, Linares JF, Rojo F, Köhler T, Martínez JL. 2012.  
454 Overproduction of the multidrug efflux pump *MexEF-OprN* does not impair  
455 *Pseudomonas aeruginosa* fitness in competition tests, but produces specific  
456 changes in bacterial regulatory networks. *Environ Microbiol.* 14(8):1968-1981.
- 457 16. Björkman J, Nagaev I, Berg O, Hughes D, Andersson DI. 2000. Effects of  
458 environment on compensatory mutations to ameliorate costs of antibiotic resistance.  
459 *Science.* 287(5457):1479-1482.
- 460 17. Gifford DR, Moss E, MacLean RC. 2016. Environmental variation alters the  
461 fitness effects of rifampicin resistance mutations in *Pseudomonas aeruginosa*.  
462 *Evolution.* 70(3):725-730.
- 463 18. Lv L, Jiang T, Zhang SH, Yu X. 2014. Exposure to mutagenic disinfection  
464 byproducts leads to increase of antibiotic resistance in *Pseudomonas aeruginosa*.  
465 *Environ Sci Technol.* 48(14):8188-8195.
- 466 19. Sander P, Springer B, Prammananan T, Sturmfels A, Kappler M, Pletschette M,  
467 Böttger EC. 2002. Fitness cost of chromosomal drug resistance-conferring  
468 mutations. *Antimicrob Agents Ch.* 46(5):1204-1211.
- 469 20. Song T, Park Y, Shamputa IC, Seo S, Lee SY, Jeon HS, Choi H, Lee M, Glynn RJ,  
470 Barnes SW. 2014. Fitness costs of rifampicin resistance in *Mycobacterium*  
471 *tuberculosis* are amplified under conditions of nutrient starvation and compensated  
472 by mutation in the  $\beta'$  subunit of RNA polymerase. *Mol Microbiol.* 91(6):1106-1119.
- 473 21. Zhang SH, Yu X, Guo F, Wu ZY. 2011. Effect of interspecies quorum sensing on  
474 the formation of aerobic granular sludge. *Water Sci Technol.* 64(6):1284-1290.
- 475 22. Livak KJ Schmittgen TD. 2001. Analysis of Relative Gene Expression Data

- 476 Using Real-Time Quantitative PCR and the  $2^{-\Delta\Delta CT}$  Method. *Methods*.  
477 25(4):402-408.
- 478 23. Andersson DI. 2006. The biological cost of mutational antibiotic resistance: any  
479 practical conclusions? *Curr Opin Microbiol*. 9(5):461-465.
- 480 24. Schweizer HP. 2003. Efflux as a mechanism of resistance to antimicrobials in  
481 *Pseudomonas aeruginosa* and related bacteria: unanswered questions. *Genet Mol*  
482 *Res*. 2(1):48-62.
- 483 25. Hengge-Aronis R. 1993. Survival of hunger and stress: The role of *rpoS* in early  
484 stationary phase gene regulation in *E. coli*. *Cell*. 72(2):165-8.
- 485 26. Shiroda M, Pratt ZL, Wong AC, Kaspar CW. 2014. *RpoS* impacts the lag phase of  
486 *Salmonella enterica* during osmotic stress. *FEMS Microbiol Lett*. 357(2):195.
- 487 27. O'Neal CR, Gabriel WM, Turk AK, Libby SJ, Fang FC, Spector MP. 1994. *RpoS*  
488 is necessary for both the positive and negative regulation of starvation survival  
489 genes during phosphate, carbon, and nitrogen starvation in *Salmonella typhimurium*.  
490 *J Bacteriol*. 176(15):4610.
- 491 28. Paulander W, Maisnier-Patin S, Andersson DI. 2009. The fitness cost of  
492 streptomycin resistance depends on *rpsL* mutation, carbon source and *RpoS* ( $\sigma^S$ ).  
493 *Genetics*. 183(2):539-546.
- 494 29. Bhargava P, Collins J. 2015. Boosting bacterial metabolism to combat antibiotic  
495 resistance. *Cell Metab*. 21(2):154-155.
- 496
- 497
- 498
- 499
- 500
- 501
- 502

503

504

505

506

507

508

509

510

511 Table 1 Bacterial strains used in this study.

| Strains                   | Mutation in <i>nfxB</i> | Mutation in <i>parC</i> | MICs ( $\mu\text{g/ml}$ ) |
|---------------------------|-------------------------|-------------------------|---------------------------|
| cip_1                     | L83P(CTG→CCG)           | S65F(TCC→TTC)           | 2                         |
| cip_2                     | 32-nt insert A          | —                       | 2                         |
| cip_3                     | L14Q(CTG→CAG)           | —                       | 2                         |
| cip_4                     | L83P(CTG→CCG)           | —                       | 2                         |
| <i>P. aeruginosa</i> PAO1 | —                       | —                       | 0.125                     |

512

513

514

515

516

### 517 **Figure legends**

518 Fig. 1 Growth curves of ciprofloxacin-resistant *P. aeruginosa* PAO1 during a  
519 competition experiment. (a) cip\_1, (b) cip\_2, (c) cip\_3, (d) cip\_4.

520

521 Fig. 2 Change in the ratio of the number of ciprofloxacin-resistant *P. aeruginosa*

522 PAO1 cells and cells of the wild-type strain. (a) cip\_1, (b) cip\_2, (c) cip\_3, (d) cip\_4.

523

524 Fig. 3 Box plots showing change in bacterial relative fitness ( $fit_t$ ) at different nutrient  
525 levels, (a) cip\_1, (b) cip\_2, (c) cip\_3, (d) cip\_4. Symbols indicate the following: box,  
526 25<sup>th</sup> to 75<sup>th</sup> percentile; horizontal line, median; square, mean value; and whiskers, 10<sup>th</sup>  
527 and 90<sup>th</sup> percentile.

528

529 Fig. 4 Change in the average bacterial fitness ( $\overline{fit}$ ) at different nutrient levels. (a)  
530 cip\_1, (b) cip\_2, (c) cip\_3, (d) cip\_4.

531

532 Fig. 5 Relative amount of *MexD* gene expression under high (500 mg/l TOC) and low  
533 (10 mg/l) nutrient conditions by RT-qPCR. Levels of mRNA were normalized to that  
534 of the wild-type strain under low-nutrient conditions (set to 1.0).

535

536 Fig. 6 Relative amount of *rpoS* gene expression in *P. aeruginosa* PAO1 under high  
537 (500 mg/l TOC) and low (10 mg/l TOC) nutrient conditions by RT-qPCR. Levels of  
538 mRNA were normalized to that of the wild-type strain under nutrient-rich conditions  
539 (set to 1.0).

540

541 Fig. 7 Respiratory rate of wild-type and ciprofloxacin resistant *P. aeruginosa* PAO1 at  
542 different nutrient levels (0.5, 5, and 500 mg/l TOC) by SOUR test. The data represent  
543 the average of three repeated independent experiments. The insets at the right top  
544 corner represent the ratios of SOURs between the wild-type and resistant strains.

545

546

547

548

549

550

551

552

553

554

555

556

557

558

559

560

561

562

563

564 TOC

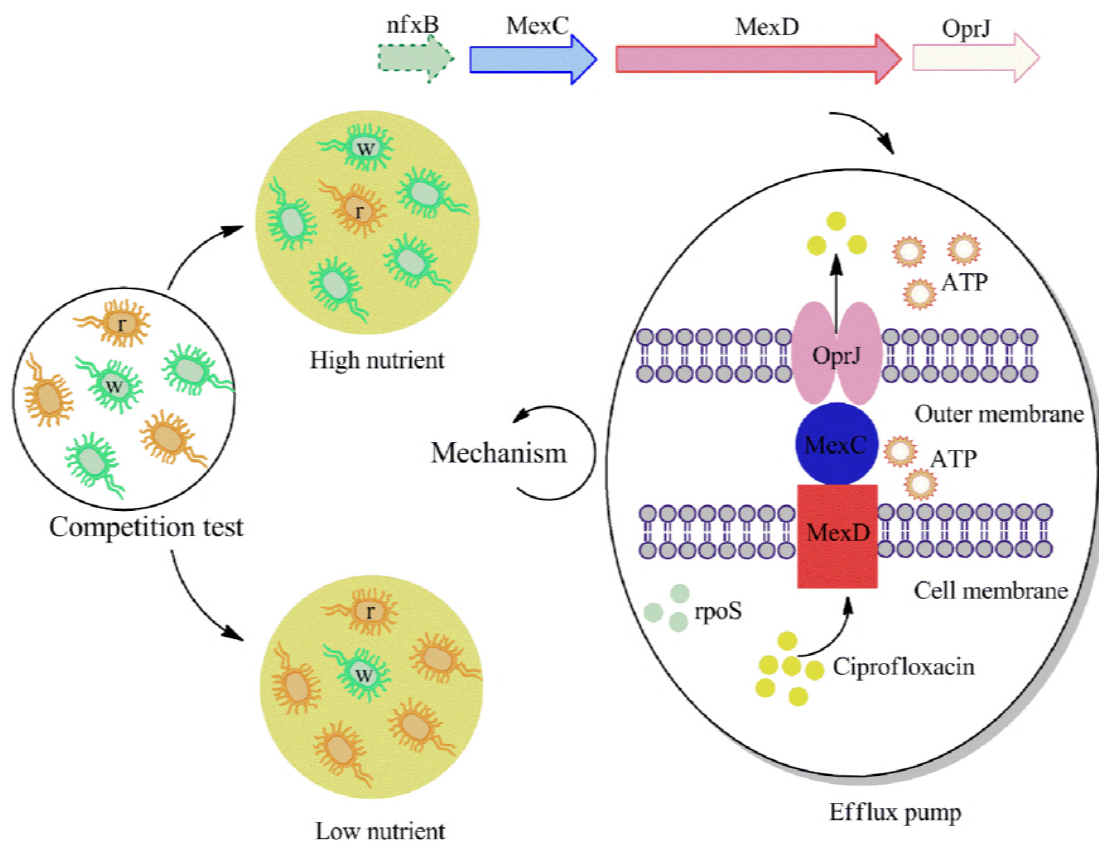

565

566

567

568

569

570

571

572

573

574

575

576

577

578

579

580 Fig. 1

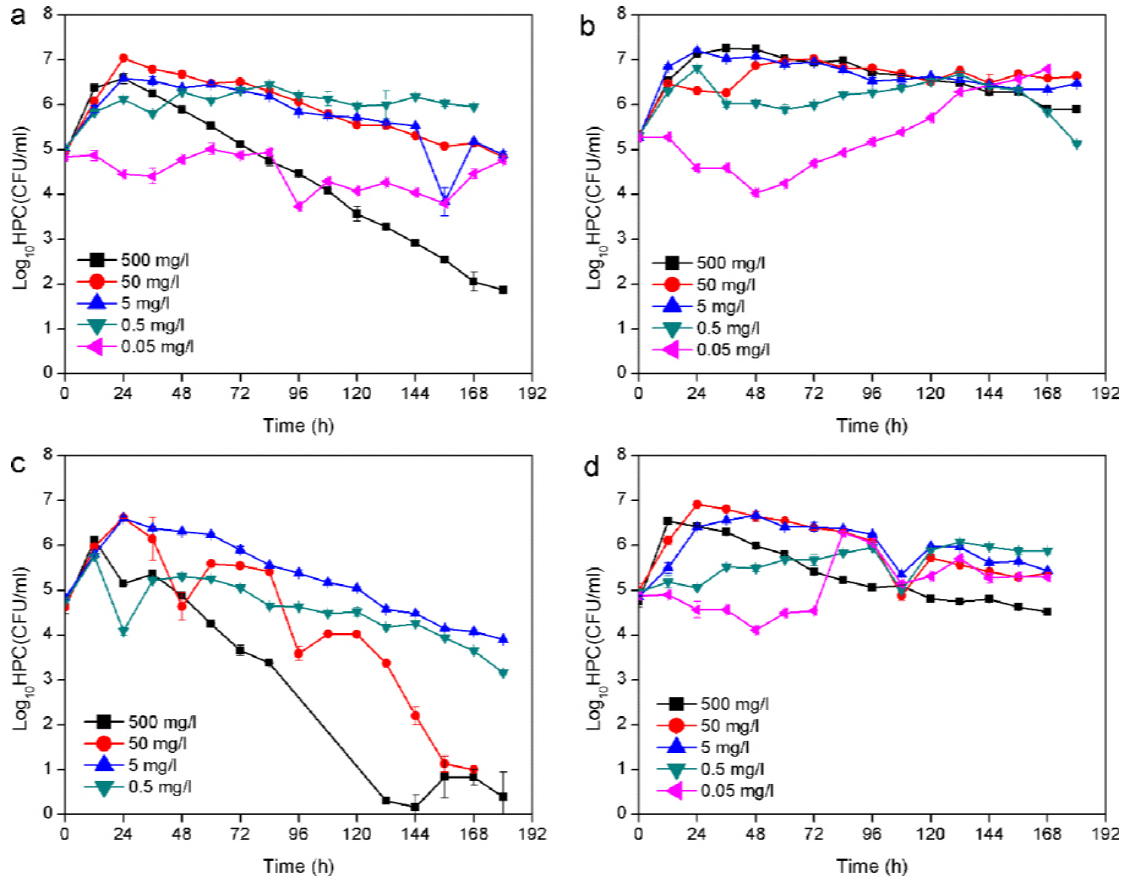

581

582

583

584

585

586

587

588

589

590

591

592

593

594

595

596 Fig. 2

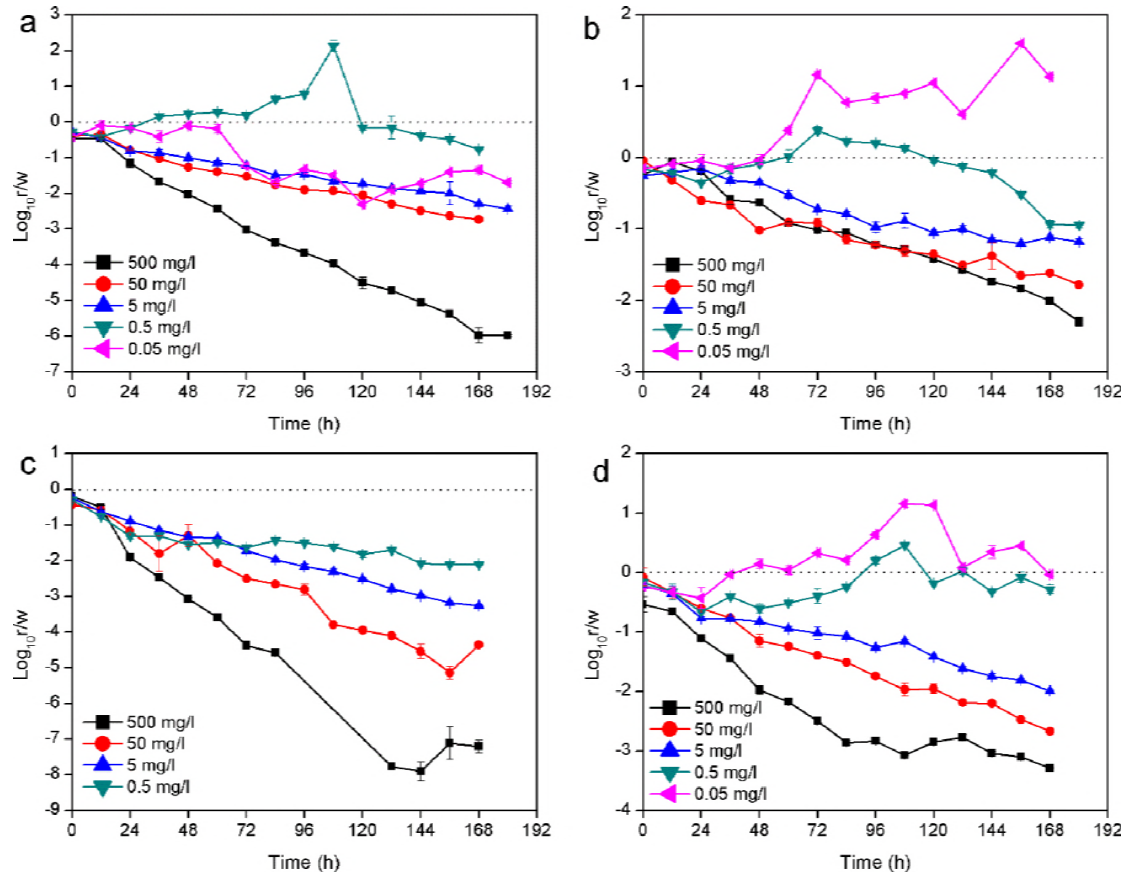

597

598

599

600

601

602

603

604

605



606

607

608

609

610

611

612 Fig. 3

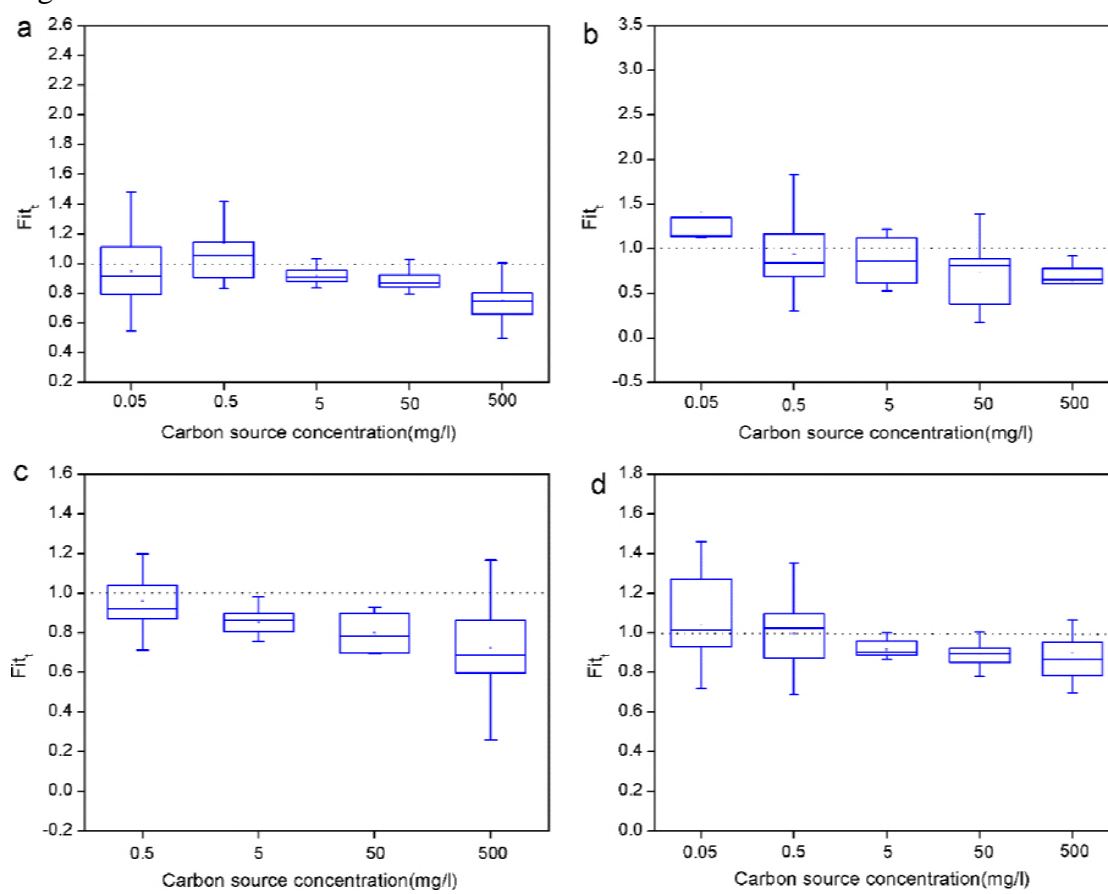

613

614

615

616

617

618

619

620

621

622

623

624

625

626

627

628 Fig. 4

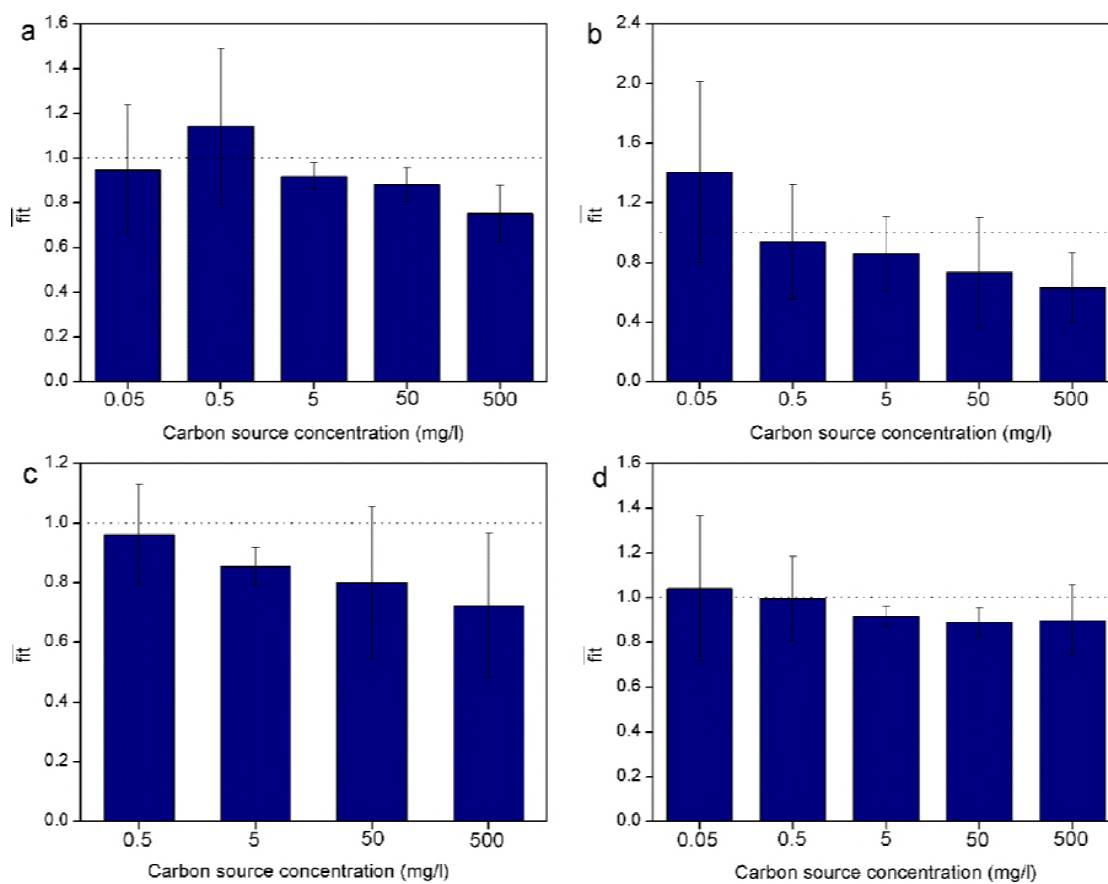

629

630

631

632

633

634

635

636

637

638

639

640

641

642

643

644 Fig. 5

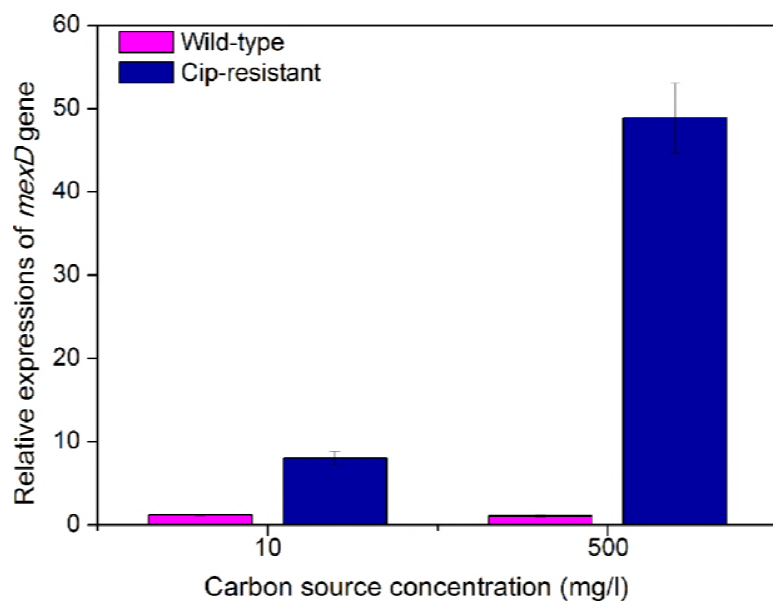

645

646

647

648

649

650

651

652

653

654

655

656

657

658

659

660

661

662

663

664 Fig. 6

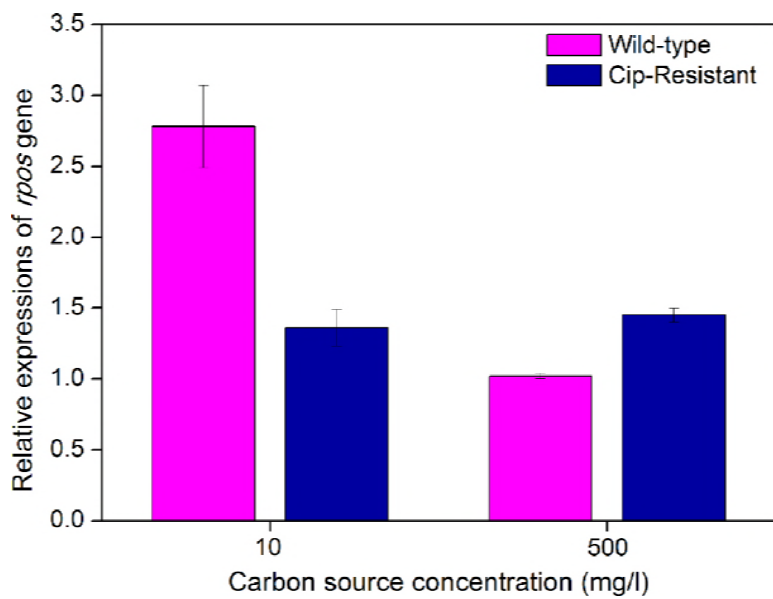

665

666

667

668

669

670

671

672

673

674

675

676

677

678

679

680

681

682

683

684

685 Fig. 7

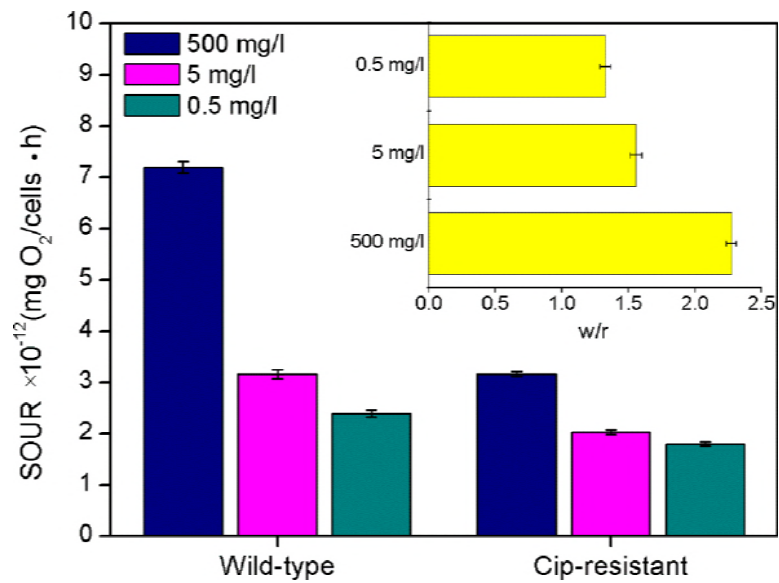

686

687

688
